# Supplementary material for: Odorants for Surveillance and Control of the Asian Citrus Psyllid (Diaphorina citri)
Source: PLoS One. 2014 Oct 27;9(10):e109236. doi: 10.1371/journal.pone.0109236 (PMC4209970; doi:10.1371/journal.pone.0109236)
Supplement: Table S2 — Field trial. Number of psyllids caught per tree per week, average number of psyllids caught per week, average preference index per week, and trial average preference index are shown. Date refers to the day each trap was set up each week. Low participation (>5 psyllids/tree in both traps) were excluded from analysis and are not included in the table. From March 1st to March 29th, trapping was only carried out on tree EL11. From April 19th to May 10th, trees EL3, EL10, and EL11 were subjected to trapping. Due to heavy rain in week of April 5th, April 12th, and April 26th, trapping was not performed. (XLS) [file pone.0109236.s003.xls]

## Sheet: Table2
	El Monte (CA/USA)
	3 Odor blend (5%)		# caught psyllids/trap		Averages caught psyllids/week		Preference index (n≥ 5)
	Trap set up day	Tree code	Blend	Control	Blend	Control	PI
	March 1st	EL11	4	3	4	3	0.142857
	March 8th	EL11	13	3	13	3	0.625
	March 22nd	EL11	12	2	12	2	0.714286
	March 29th	EL11	40	10	40	10	0.6
	April 19th	EL10	23	6	19.5	4	0.659574
	April 19th	EL11	16	2
	May 3rd	EL3	6	8	17.3333	6	0.485714
	May 3rd	EL10	36	6
	May 3rd	EL11	10	4
	May 10th	EL3	7	3	12	7	0.263158
	May 10th	EL10	23	6
	May 10th	EL11	6	12
				Mean	16.8333	5	0.498656
				Std	11.3297	2.82843	0.21635
				n	7	7	7
				SEM	4.28221	1.06904	0.0817726
